# Supplementary material for: Construction of hierarchical Ag@TiO2@ZnO nanowires with high photocatalytic activity
Source: Royal Society of Chemistry journal article supplement (doi:10.1039/c7nj02302b), 2017-11-15
Supplement: c7nj02302b1.pdf [file c7nj02302b1.pdf]

## Supplementary Information for

### Construction of Hierarchical Ag@TiO<sub>2</sub>@ZnO Nanowires with High Photocatalytic Activity

Xiao-Bo Xiang, Yang Yu, Wei Wen, and Jin-Ming Wu

Published in New Journal of Chemistry

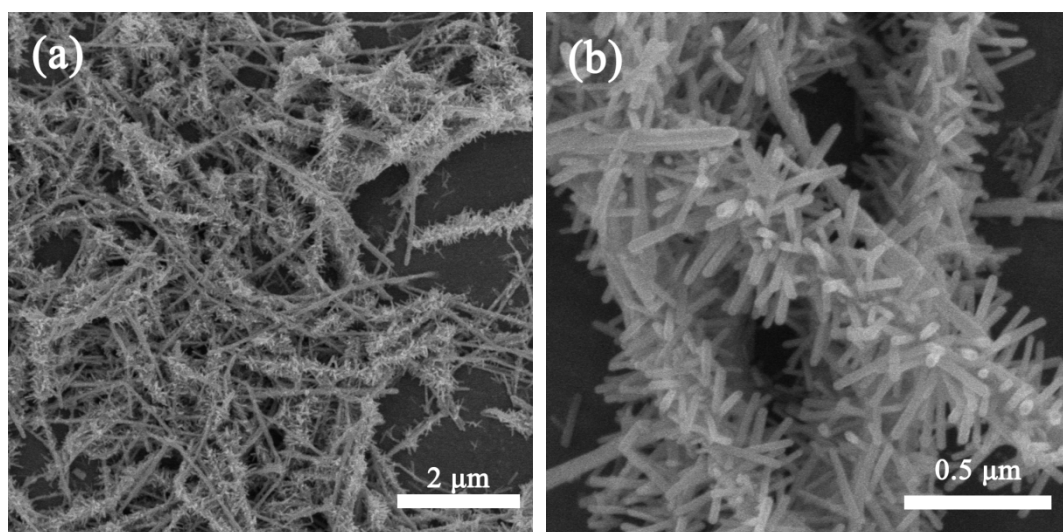

Figure S1. (a) Low and (b) high magnification FESEM images of the Ag@ZnO nanowires.

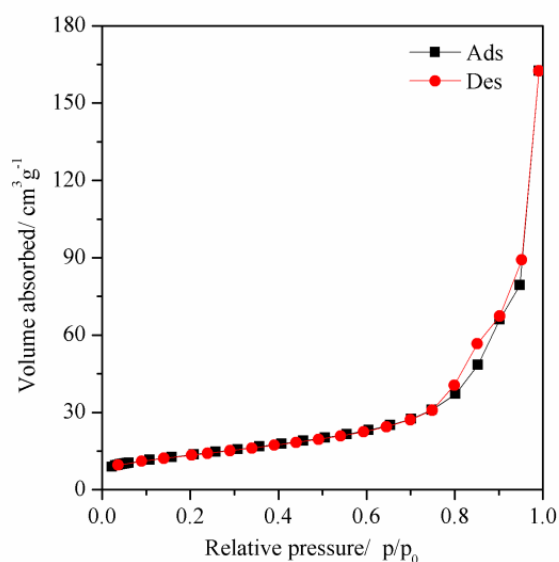

Figure S2. Adsorption-desorption isotherm curve of N<sub>2</sub> at 77 K for Ag@TiO<sub>2</sub>@ZnO.
